# Supplementary material for: The importance of intermediate filaments in the shape maintenance of myoblast model tissues
Source: eLife. 2022 Dec 1;11:e76409. doi: 10.7554/eLife.76409 (PMC9754632; doi:10.7554/eLife.76409)
Supplement: Figure 1—figure supplement 1—source data 1. — Measurement of the fluorescence (λexc=570 nm and λem=585 nm) after 1h30 incubation with the Alamar blue solution. [file elife-76409-fig1-figsupp1-data1.xlsx]

## Sheet: Feuil2
Measurement of the fluorescence (λexc = 570 nm and λem = 585 nm) after 1h30 incubation with the Alamar blue solution
D0			[Fe]						With blank substraction			[Fe]
		CTL	2 mM	4 mM	8 mM	16 mM	blank				CTL	2 mM	4 mM	8 mM	16 mM	blank
	1	95439	98786	103053	87718	89490				1	82410	85757	90024	74689	76461	13029
	2	104516	112569	106011	99394	102957				2	91487	99540	92982	86365	89928	13029
	Average	99977.5	105678	104532	93556	96223.5	13029			Average	86948.5	92648.5	91503	80527	83194.5
	Standard deviation	6418.41	9746.05	2091.62	8256.18	9522.61				Standard deviation	6418.41	9746.05	2091.62	8256.18	9522.61
D1			[Fe]						With blank substraction			[Fe]
		CTL	2 mM	4 mM	8 mM	16 mM	blank				CTL	2 mM	4 mM	8 mM	16 mM	blank
	1	170674	170453	182983	169670	169781				1	153722	153501	166031	152718	152829	16952
	2	174811	165690	200380	186748	184267				2	157859	148738	183428	169796	167315	16952
	Average	172742	168072	191682	178209	177024	16952			Average	155790	151120	174730	161257	160072
	Standard deviation	2925.3	3367.95	12301.5	12076	10243.1				Standard deviation	2925.3	3367.95	12301.5	12076	10243.1
										In percentage (%)
									Average			[Fe]
											CTL	2 mM	4 mM	8 mM	16 mM
										D0	100	106.556	105.238	92.6146	95.6825
										D1	100	97.0017	112.157	103.509	102.748
									Standard deviation
											CTL	2 mM	4 mM	8 mM	16 mM
										D0	7.38185	11.209	2.40559	9.49548	10.952
										D1	1.87771	2.16185	7.8962	7.75142	6.57495
