# Supplementary material for: The importance of intermediate filaments in the shape maintenance of myoblast model tissues
Source: eLife. 2022 Dec 1;11:e76409. doi: 10.7554/eLife.76409 (PMC9754632; doi:10.7554/eLife.76409)
Supplement: Figure 1—figure supplement 4—source data 1. — The dynamic of flattening process is reported for 5 different aggregates. [file elife-76409-fig1-figsupp4-data1.xlsx]

## Sheet: 0,15 µM Lat A
	Beads 1,6 mm
	2 mm=1023 pixels
image 17	1.95503		µm/pixels
		ag2 Lat A 0,15 µM		2020-01-16		V= 7,44 E-10 m^3					ag5 Lat A 0,15 µM	2020-01-16		V= 7,21 E-10 m^3
	image	t (s)	height (pixels)	height (µm)	height(%)	uncertainty (pixels)	uncertainty (µm)			image	t (s)	height (pixels)	height (µm)	height(%)	uncertainty (pixels)	uncertainty (µm)
dt=1s	0	0	588	1149.56	100	5	9.77517		dt=1s	0	0	538	1051.81	100	5	9.77517
	32	1	567	1108.5	96.4286	5	9.77517			19	1	519	1014.66	96.4684	5	9.77517
	33	2	563	1100.68	95.7483	5	9.77517			20	2	512	1000.98	95.1673	5	9.77517
	34	3	564	1102.64	95.9184	5	9.77517			21	3	503	983.382	93.4944	5	9.77517
	35	4	562	1098.73	95.5782	5	9.77517			22	4	500	977.517	92.9368	5	9.77517
	36	5	557	1088.95	94.7279	5	9.77517			23	5	500	977.517	92.9368	5	9.77517
	37	6	547	1069.4	93.0272	5	9.77517			24	6	500	977.517	92.9368	5	9.77517
	38	7	540	1055.72	91.8367	5	9.77517			25	7	494	965.787	91.8216	5	9.77517
	39	8	530	1036.17	90.1361	5	9.77517			26	8	492	961.877	91.4498	5	9.77517
	40	9	523	1022.48	88.9456	5	9.77517			27	9	491	959.922	91.2639	5	9.77517
	41	10	525	1026.39	89.2857	5	9.77517			28	10	492	961.877	91.4498	5	9.77517
	61	30	512	1000.98	87.0748	5	9.77517			48	30	489	956.012	90.8922	5	9.77517
	91	60	508	993.157	86.3946	5	9.77517			78	60	489	956.012	90.8922	5	9.77517
	151	120	512	1000.98	87.0748	5	9.77517			138	120	486	950.147	90.3346	5	9.77517
dt=1min	3	240	510	997.067	86.7347	5	9.77517		dt=1min	3	240	486	950.147	90.3346	5	9.77517
	5	360	507	991.202	86.2245	5	9.77517			5	360	485	948.192	90.1487	5	9.77517
	7	480	507	991.202	86.2245	5	9.77517			7	480	486	950.147	90.3346	5	9.77517
	9	600	512	1000.98	87.0748	5	9.77517			9	600	486	950.147	90.3346	5	9.77517
		height (%)
	t (s)	ag 2	ag 5	Average	Standard deviation
	0	100	100	100	1.5
	1	96.4286	96.4684	96.4485
	2	95.7483	95.1673	95.4578
	3	95.9184	93.4944	94.7064
	4	95.5782	92.9368	94.2575
	5	94.7279	92.9368	93.8323
	6	93.0272	92.9368	92.982
	7	91.8367	91.8216	91.8291
	8	90.1361	91.4498	90.7929
	9	88.9456	91.2639	90.1048
	10	89.2857	91.4498	90.3678
	30	87.0748	90.8922	88.9835
	60	86.3946	90.8922	88.6434
	120	87.0748	90.3346	88.7047
	240	86.7347	90.3346	88.5346
	360	86.2245	90.1487	88.1866
	480	86.2245	90.3346	88.2795
	600	87.0748	90.3346	88.7047

## Sheet: 0,25 µM LatA
	Beads 1,6 mm
	2 mm=1023 pixels
	1.95503		µm/pixels
		ag3 Lat A 0,25 µM		2020-01-16		V= 5,20 E-10 m^3					ag4 Lat A 0,25 µM		2020-01-16		V= 5,85 E-10 m^3
	image	t (s)	height (pixels)	height (µm)	height(%)	uncertainty (pixels)	uncertainty (µm)			image	t (s)	height (pixels)	height (µm)	height(%)	uncertainty (pixels)	uncertainty (µm)
dt=1s	0	0	472	922.776	100.426	5	9.77517		dt=1s	0	0	516	1008.8	100	5	9.77517
	22	1	470	918.866	100	5	9.77517			22	1	517	1010.75	100.194	5	9.77517
	23	2	458	895.406	97.4468	5	9.77517			23	2	511	999.022	99.031	5	9.77517
	24	3	437	854.35	92.9787	5	9.77517			24	3	495	967.742	95.9302	5	9.77517
	25	4	417	815.249	88.7234	5	9.77517			25	4	480	938.416	93.0233	5	9.77517
	26	5	407	795.699	86.5957	5	9.77517			26	5	463	905.181	89.7287	5	9.77517
	27	6	408	797.654	86.8085	5	9.77517			27	6	452	883.675	87.5969	5	9.77517
	28	7	407	795.699	86.5957	5	9.77517			28	7	450	879.765	87.2093	5	9.77517
	29	8	404	789.834	85.9574	5	9.77517			29	8	450	879.765	87.2093	5	9.77517
	30	9	406	793.744	86.383	5	9.77517			30	9	449	877.81	87.0155	5	9.77517
	31	10	404	789.834	85.9574	5	9.77517			31	10	444	868.035	86.0465	5	9.77517
	51	30	396	774.194	84.2553	5	9.77517			51	30	431	842.62	83.5271	5	9.77517
	81	60	392	766.373	83.4043	5	9.77517			81	60	430	840.665	83.3333	5	9.77517
	141	120	389	760.508	82.766	5	9.77517		dt=1min	1	120	427	834.8	82.7519	5	9.77517
dt=1min	3	240	385	752.688	81.9149	5	9.77517			3	240	420	821.114	81.3953	5	9.77517
	5	360	384	750.733	81.7021	5	9.77517			5	360	416	813.294	80.6202	5	9.77517
	7	480	384	750.733	81.7021	5	9.77517			7	480	419	819.159	81.2016	5	9.77517
	9	600	386	754.643	82.1277	5	9.77517			9	600	419	819.159	81.2016	5	9.77517
	11	720	384	750.733	81.7021	5	9.77517			11	720	415	811.339	80.4264	5	9.77517
	13	840	381	744.868	81.0638	5	9.77517			13	840	417	815.249	80.814	5	9.77517
	15	960	386	754.643	82.1277	5	9.77517			15	960	417	815.249	80.814	5	9.77517
	Height (%)
t (s)	ag 3	ag 4	Average	Standard deviation
0	100.426	100	100.213	1.5
1	100	100.194	100.097
2	97.4468	99.031	98.2389
3	92.9787	95.9302	94.4545
4	88.7234	93.0233	90.8733
5	86.5957	89.7287	88.1622
6	86.8085	87.5969	87.2027
7	86.5957	87.2093	86.9025
8	85.9574	87.2093	86.5834
9	86.383	87.0155	86.6992
10	85.9574	86.0465	86.002
30	84.2553	83.5271	83.8912
60	83.4043	83.3333	83.3688
120	82.766	82.7519	82.7589
240	81.9149	81.3953	81.6551
360	81.7021	80.6202	81.1611
480	81.7021	81.2016	81.4518
600	82.1277	81.2016	81.6646
720	81.7021	80.4264	81.0642
840	81.0638	80.814	80.9389
960	82.1277	80.814	81.4708

## Sheet: 2,5 mM EGTA
	Beads 1,6 mm
	2 mm=982 pixels
	2.03666		µm/pixels
ag1 2,5 mM EGTA		2019-12-20		V= 6,96 E-10 m^3						ag3 2,5 mM EGTA		2019-12-20		V= 6,41 E-10 m^3
	image	t (s)	height (pixels)	height (µm)	height(%)	RG(pixels)	S1/2 (pixels)	V (m^3)			image	t (s)	height (pixels)	height (µm)	height(%)
dt=1s	49	0	508	1034.62	100	130	107487	7.41711e-10		dt=1s	0	0	497	1012.22	100
	50	1	500	1018.33	98.4252						37	1	489	995.927	98.3903
	51	2	494	1006.11	97.2441						38	2	484	985.743	97.3843
	52	3	483	983.707	95.0787						39	3	476	969.45	95.7746
	53	4	466	949.084	91.7323						40	4	467	951.12	93.9638
	54	5	458	932.79	90.1575						41	5	458	932.79	92.1529
	55	6	450	916.497	88.5827						42	6	448	912.424	90.1408
	56	7	445	906.314	87.5984						43	7	448	912.424	90.1408
	57	8	448	912.424	88.189						44	8	444	904.277	89.336
	58	9	449	914.46	88.3858						45	9	447	910.387	89.9396
	59	10	448	912.424	88.189						46	10	446	908.35	89.7384
	79	30	442	900.204	87.0079						66	30	435	885.947	87.5252
	109	60	423	861.507	83.2677						96	60	428	871.69	86.1167
	169	120	411	837.067	80.9055						156	120	430	875.764	86.5191
dt=1min	3	240	399	812.627	78.5433					dt=1min	3	240	420	855.397	84.507
	5	360	392	798.371	77.1654						5	360	413	841.141	83.0986
	7	480	389	792.261	76.5748						7	480	409	832.994	82.2938
	9	600	393	800.407	77.3622						9	600	406	826.884	81.6901
	11	720	388	790.224	76.378						11	720	406	826.884	81.6901
	13	840	387	788.187	76.1811						13	840	404	822.811	81.2877
	15	960	386	786.151	75.9843						15	960	397	808.554	79.8793
	17	1080	381	775.967	75						17	1080	396	806.517	79.6781
	19	1200	380	773.931	74.8031						19	1200	396	806.517	79.6781
	21	1320	376	765.784	74.0157						21	1320	396	806.517	79.6781
	23	1440	377	767.821	74.2126						23	1440	392	798.371	78.8732
	25	1560	377	767.821	74.2126						25	1560	390	794.297	78.4708
	Height (%)
t (s)	ag 1	ag 3	Average	Standard deviation
0	100	100	100	2
1	98.4252	98.3903	98.4078
2	97.2441	97.3843	97.3142
3	95.0787	95.7746	95.4267
4	91.7323	93.9638	92.848
5	90.1575	92.1529	91.1552
6	88.5827	90.1408	89.3618
7	87.5984	90.1408	88.8696
8	88.189	89.336	88.7625
9	88.3858	89.9396	89.1627
10	88.189	89.7384	88.9637
30	87.0079	87.5252	87.2665
60	83.2677	86.1167	84.6922
120	80.9055	86.5191	83.7123
240	78.5433	84.507	81.5252
360	77.1654	83.0986	80.132
480	76.5748	82.2938	79.4343
600	77.3622	81.6901	79.5262
720	76.378	81.6901	79.034
840	76.1811	81.2877	78.7344
960	75.9843	79.8793	77.9318
1080	75	79.6781	77.339
1200	74.8031	79.6781	77.2406
1320	74.0157	79.6781	76.8469
1440	74.2126	78.8732	76.5429
1560	74.2126	78.4708	76.3417

## Sheet: C2C12 WT - EGTA
Beads 1,6 mm
2 mm=982 pixels
2.03666		µm/pixels
ag7 20/12/2019		V= 7,51 E-10 m^3						ag8 20/12/2019		V= 8,76 E-10 m^3
	image	t (s)	height (pixels)	height (µm)	height(%)				image	t (s)	height (pixels)	height (µm)	height(%)
dt=1s	0	0	541	1101.83	100			dt=1s	0	0	576	1173.12	100
	26	1	526	1071.28	97.2274				18	1	563	1146.64	97.7431
	27	2	516	1050.92	95.3789				19	2	565	1150.71	98.0903
	28	3	516	1050.92	95.3789				20	3	558	1136.46	96.875
	29	4	514	1046.84	95.0092				21	4	550	1120.16	95.4861
	30	5	512	1042.77	94.6396				22	5	548	1116.09	95.1389
	55	30	516	1050.92	95.3789				47	30	543	1105.91	94.2708
	85	60	514	1046.84	95.0092				77	60	545	1109.98	94.6181
	145	120	512	1042.77	94.6396				137	120	542	1103.87	94.0972
dt=1min	3	240	513	1044.81	94.8244			dt=1min	2	240	540	1099.8	93.75
	5	360	513	1044.81	94.8244				4	360	538	1095.72	93.4028
	7	480	511	1040.73	94.4547				6	480	541	1101.83	93.9236
	9	600	514	1046.84	95.0092				8	600	542	1103.87	94.0972
	Height (%)
t (s)	ag 7	ag 8	Average	Standard deviation
0	100	100	100	1
1	97.2274	97.7431	97.4852
2	95.3789	98.0903	96.7346
3	95.3789	96.875	96.127
4	95.0092	95.4861	95.2477
5	94.6396	95.1389	94.8892
30	95.3789	94.2708	94.8249
60	95.0092	94.6181	94.8136
120	94.6396	94.0972	94.3684
240	94.8244	93.75	94.2872
360	94.8244	93.4028	94.1136
480	94.4547	93.9236	94.1892
600	95.0092	94.0972	94.5532

## Sheet: C2C12 WT - Bleb
Beads 1,6 mm
2 mm=904 pixels
2.21239		µm/pixels
ag15 13/03/2020		V= 8,63 E-10 m^3						ag16 13/03/2020		V= 7,81 E-10 m^3
	image	t (s)	height (pixels)	height (µm)	height(%)				image	t (s)	height (pixels)	height (µm)	height(%)
dt=1s	0	0	536	1185.84	100			dt=1s	0	0	520	1150.44	100
	18	1	528	1168.14	98.5075				12	1	513	1134.96	98.6538
	19	2	528	1168.14	98.5075				13	2	506	1119.47	97.3077
	20	3	527	1165.93	98.3209				14	3	509	1126.11	97.8846
	21	4	523	1157.08	97.5746				15	4	506	1119.47	97.3077
	22	5	528	1168.14	98.5075				16	5	504	1115.04	96.9231
	47	30	523	1157.08	97.5746				41	30	496	1097.35	95.3846
	77	60	520	1150.44	97.0149				71	60	502	1110.62	96.5385
	137	120	522	1154.87	97.3881				131	120	498	1101.77	95.7692
dt=1min	3	240	519	1148.23	96.8284			dt=1min	3	240	504	1115.04	96.9231
	5	360	519	1148.23	96.8284				5	360	500	1106.19	96.1538
	7	480	521	1152.65	97.2015				7	480	504	1115.04	96.9231
	9	600	519	1148.23	96.8284				9	600	503	1112.83	96.7308
	Height (%)
t (s)	ag 15	ag 16	Average	Standard deviation
0	100	100	100	1
1	98.5075	98.6538	98.5807
2	98.5075	97.3077	97.9076
3	98.3209	97.8846	98.1028
4	97.5746	97.3077	97.4412
5	98.5075	96.9231	97.7153
30	97.5746	95.3846	96.4796
60	97.0149	96.5385	96.7767
120	97.3881	95.7692	96.5786
240	96.8284	96.9231	96.8757
360	96.8284	96.1538	96.4911
480	97.2015	96.9231	97.0623
600	96.8284	96.7308	96.7796

## Sheet: C2C12 WT - LatA
Beads 1,6 mm
2 mm=1023 pixels
1.95503		µm/pixels
ag8 DMEMc	2020-01-16		V= 7,04 E-10 m^3					ag9 DMEMc	2020-01-16	V= 6,22 E-10 m^3					ag1 DMEMc	2020-01-16	V= 6,22 E-10 m^3
	image	t (s)	height (pixels)	height (µm)	height(%)				image	t (s)	height (pixels)	height (µm)	height(%)			image	t (s)	height (pixels)	height (µm)	height(%)
dt=1s	0	0	548	1071.36	100			dt=1s_1	0	0	539	1053.76	100		dt=1s_1	0	0	588	1149.56	100
	18	1	544	1063.54	99.2701				19	1	536	1047.9	99.4434			19	1		0	0
	19	2	536	1047.9	97.8102				20	2	528	1032.26	97.9592			20	2		0	0
	20	3		0	0				21	3	525	1026.39	97.4026			21	3		0	0
	21	4		0	0				22	4	523	1022.48	97.0315			22	4		0	0
	22	5	533	1042.03	97.2628				23	5	520	1016.62	96.475			23	5		0	0
	47	30	536	1047.9	97.8102				48	30	517	1010.75	95.9184			48	30		0	0
	77	60	536	1047.9	97.8102				78	60	516	1008.8	95.7328		dt=1min	1	60	539	1053.76	91.6667
	122 au lieu de 137	120	535	1045.94	97.6277			dt=1s_2	19	120	518	1012.71	96.1039			3	120	535	1045.94	90.9864
dt=1min	3	240	532	1040.08	97.0803			dt=1min	3	240	515	1006.84	95.5473			5	240	538	1051.81	91.4966
	5	360	532	1040.08	97.0803				5	360	513	1002.93	95.1763			7	360	539	1053.76	91.6667
	7	480		0	0				7	480	515	1006.84	95.5473			9	480	538	1051.81	91.4966
	9	600		0	0				9	600	516	1008.8	95.7328			11	600	540	1055.72	91.8367
	Height (%)
t (s)	ag 8	ag 9	ag1	Average	Standard deviation
0	100	100	100	100	1
1	99.2701	99.4434		99.3567
2	97.8102	97.9592		97.8847
3		97.4026		97.4026
4		97.0315		97.0315
5	97.2628	96.475		96.8689
30	97.8102	95.9184		96.8643
60	97.8102	95.7328	91.6667	95.0699
120	97.6277	96.1039	90.9864	94.906
240	97.0803	95.5473	91.4966	94.7081
360	97.0803	95.1763	91.6667	94.6411
480	97	95.5473	91.4966	94.6813
600	97	95.7328	91.8367	94.8565
			0

## Sheet: (+-)-Bleb 10 µM
Beads 1,6 mm
2 mm=923 pixels
2.16685		µm/pixels
ag3 11/03/2020		V= 9,61 E-10 m^3					ag7 11/03/2020		V= 9,09 E-10 m^3
	image	t (s)	height (pixels)	height (µm)	height(%)			image	t (s)	height (pixels)	height (µm)	height(%)
dt=1s	17	0	558	1209.1	100		dt=1s	0	0	563	1204.77	99.6416
	18	1	546	1183.1	97.8495			17	1	556	1170.1	96.7742
	19	2	536	1161.43	96.0573			18	2	540	1163.6	96.2366
	20	3	539	1167.93	96.595			19	3	537	1152.76	95.3405
	21	4	539	1167.93	96.595			20	4	532	1154.93	95.5197
	22	5	540	1170.1	96.7742			21	5	533	1159.26	95.8781
	23	6	532	1152.76	95.3405			22	6	535	1161.43	96.0573
	24	7	535	1159.26	95.8781			23	7	536	1146.26	94.8029
	25	8	537	1163.6	96.2366			24	8	529	1148.43	94.9821
	26	9	534	1157.1	95.6989			25	9	530	1150.6	95.1613
	27	10	533	1154.93	95.5197			26	10	531	1139.76	94.2652
	47	30	524	1135.43	93.9068			46	30	526	1135.43	93.9068
	77	60	520	1126.76	93.19			76	60	524	1126.76	93.19
	137	120	520	1126.76	93.19			136	120	520	1118.09	92.4731
dt=1min	3	240	521	1128.93	93.3692		dt=1min	3	240	516	1118.09	92.4731
	5	360	517	1120.26	92.6523			5	360	513	1111.59	91.9355
	7	480	522	1131.09	93.5484			7	480	512	1109.43	91.7563
	9	600	522	1131.09	93.5484			9	600	517	1120.26	92.6523
	Height (%)
t (s)	ag 3	ag 7	Average	Standard deviation
0	100	99.6416	99.8208	1
1	97.8495	96.7742	97.3118
2	96.0573	96.2366	96.147
3	96.595	95.3405	95.9677
4	96.595	95.5197	96.0573
5	96.7742	95.8781	96.3262
6	95.3405	96.0573	95.6989
7	95.8781	94.8029	95.3405
8	96.2366	94.9821	95.6093
9	95.6989	95.1613	95.4301
10	95.5197	94.2652	94.8925
30	93.9068	93.9068	93.9068
60	93.19	93.19	93.19
120	93.19	92.4731	92.8315
240	93.3692	92.4731	92.9211
360	92.6523	91.9355	92.2939
480	93.5484	91.7563	92.6523
600	93.5484	92.6523	93.1004

## Sheet: (+-)-Bleb 40 µM
Beads 1,6 mm
2 mm=904 pixels
2.21239		µm/pixels
ag4 13/03/2020		V= 9,87 E-10 m^3					ag5 13/03/2020		V= 8,49 E-10 m^3
	image	t (s)	height (pixels)	height (µm)	height(%)			image	t (s)	height (pixels)	height (µm)	height(%)
dt=1s	0	0	551	1219.03	100		dt=1s	0	0	510	1128.32	100
	14	1	544	1203.54	98.7296
	15	2	546	1207.96	99.0926
	16	3	532	1176.99	96.5517
	17	4	518	1146.02	94.0109
	18	5	496	1097.35	90.0181
	19	6	492	1088.5	89.2922
	20	7	490	1084.07	88.9292
	21	8	487	1077.43	88.3848
	22	9	483	1068.58	87.6588
	23	10	486	1075.22	88.2033
	43	30	476	1053.1	86.3884
	73	60	464	1026.55	84.2105		dt=1min	1	60	449	993.363	88.0392
	133	120	456	1008.85	82.7586			2	120	445	984.513	87.2549
dt=1min	3	240	461	1019.91	83.6661			4	240	441	975.664	86.4706
	5	360	459	1015.49	83.3031			6	360	445	984.513	87.2549
	7	480	462	1022.12	83.8475			8	480	445	984.513	87.2549
	9	600	461	1019.91	83.6661			10	600	447	988.938	87.6471
	Height (%)
t (s)	ag 4	ag 5	Average	Standard deviation
0	100	100	100	1
1	98.7296		98.7296
2	99.0926		99.0926
3	96.5517		96.5517
4	94.0109		94.0109
5	90.0181		90.0181
6	89.2922		89.2922
7	88.9292		88.9292
8	88.3848		88.3848
9	87.6588		87.6588
10	88.2033		88.2033
30	86.3884		86.3884
60	84.2105	88.0392	86.1249
120	82.7586	87.2549	85.0068
240	83.6661	86.4706	85.0683
360	83.3031	87.2549	85.279
480	83.8475	87.2549	85.5512
600	83.6661	87.6471	85.6566

## Sheet: (+-)-Bleb 160 µM
Beads 1,6 mm
2 mm=904 pixels
2.21239		µm/pixels
ag9 13/03/2020		V= 9,66 E-10 m^3					ag10 13/03/2020		V= 8,71 E-10 m^3
	image	t (s)	height (pixels)	height (µm)	height(%)			image	t (s)	height (pixels)	height (µm)	height(%)
dt=1s	0	0	554	1225.66	100		dt=1s	0	0	508	1123.89	100
	14	1	531	1174.78	95.8484			13	1	497	1099.56	97.8346
	15	2	505	1117.26	91.1552			14	2	477	1055.31	93.8976
	16	3	479	1059.73	86.4621			15	3	460	1017.7	90.5512
	17	4	477	1055.31	86.1011			16	4	449	993.363	88.3858
	18	5	473	1046.46	85.3791			17	5	445	984.513	87.5984
	19	6	467	1033.19	84.296			18	6	445	984.513	87.5984
	20	7	463	1024.34	83.574			19	7	445	984.513	87.5984
	21	8	465	1028.76	83.935			20	8	440	973.451	86.6142
	22	9	462	1022.12	83.3935			21	9	439	971.239	86.4173
	23	10	460	1017.7	83.0325			22	10	436	973.451	86.6142
	43	30	447	988.938	80.6859			43	30	422	933.628	83.0709
	73	60	438	969.027	79.0614			73	60	414	915.929	81.4961
	133	120	431	953.54	77.7978			133	120	410	907.08	80.7087
dt=1min	3	240	427	944.69	77.0758		dt=1min	3	240	402	889.381	79.1339
	5	360	423	935.841	76.3538			5	360	403	891.593	79.3307
	7	480	423	935.841	76.3538			7	480	402	889.381	79.1339
	9	600	427	944.69	77.0758			9	600	403	891.593	79.3307
	11	720	427	944.69	77.0758			11	720	404	893.805	79.5276
	13	840	427	944.69	77.0758			13	840	405	896.018	79.7244
	15	960	425	940.265	76.7148
	Height (%)
t (s)	ag 9	ag 10	Average	Standard deviation
0	100	100	100	2
1	95.8484	97.8346	96.8415
2	91.1552	93.8976	92.5264
3	86.4621	90.5512	88.5066
4	86.1011	88.3858	87.2435
5	85.3791	87.5984	86.4887
6	84.296	87.5984	85.9472
7	83.574	87.5984	85.5862
8	83.935	86.6142	85.2746
9	83.3935	86.4173	84.9054
10	83.0325	86.6142	84.8233
30	80.6859	83.0709	81.8784
60	79.0614	81.4961	80.2787
120	77.7978	80.7087	79.2532
240	77.0758	79.1339	78.1048
360	76.3538	79.3307	77.8422
480	76.3538	79.1339	77.7438
600	77.0758	79.3307	78.2033
720	77.0758	79.5276	78.3017
840	77.0758	79.7244	78.4001
960	76.7148		76.7148

## Sheet: desWT-Cl29 no HS
Beads 1,6 mm
2 mm=1062 pixels
1.88324		µm/pixels
ag3 24/01/2020		V= 8,34 E-10 m^3					ag6 24/01/2020		V= 8,28 E-10 m^3
	image	t (s)	height (pixels)	height (µm)	height(%)			image	t (s)	height (pixels)	height (µm)	height(%)
dt=1s	18	0	604	1137.48	100		dt=1s	27	0	629	1184.56	100
	19	1	597	1124.29	98.8411			28	1	621	1169.49	98.7281
	20	2	585	1101.69	96.8543			29	2	602	1133.71	95.7075
	21	3	584	1099.81	96.6887			30	3	605	1139.36	96.1844
	22	4	584	1099.81	96.6887			31	4	600	1129.94	95.3895
	23	5	584	1099.81	96.6887			32	5	594	1118.64	94.4356
	48	30	580	1092.28	96.0265			57	30	591	1112.99	93.9587
	78	60	579	1090.4	95.8609			87	60	586	1103.58	93.1638
	138	120	580	1092.28	96.0265			147	120	580	1092.28	92.2099
dt=1min	3	240	577	1086.63	95.5298		dt=1min	1	240	581	1094.16	92.3688
	5	360	581	1094.16	96.1921			3	360	582	1096.05	92.5278
	7	480	584	1099.81	96.6887			5	480	582	1096.05	92.5278
	9	600	581	1094.16	96.1921
	Height (%)
t (s)	ag 3	ag 6	Average	Standard deviation
0	100	100	100	1.5
1	98.8411	98.7281	98.7846
2	96.8543	95.7075	96.2809
3	96.6887	96.1844	96.4366
4	96.6887	95.3895	96.0391
5	96.6887	94.4356	95.5622
30	96.0265	93.9587	94.9926
60	95.8609	93.1638	94.5123
120	96.0265	92.2099	94.1182
240	95.5298	92.3688	93.9493
360	96.1921	92.5278	94.3599
480	96.6887	92.5278	94.6083
600	96.1921

[truncated: 5 more sheets: desD399Y-Cl26 no HS, desWT-Cl29 HS 30min, desD399Y-Cl26 HS 30min, desWT-Cl29 HS 2h, desD399Y-Cl26 HS 2h]
