# Supplementary material for: The importance of intermediate filaments in the shape maintenance of myoblast model tissues
Source: eLife. 2022 Dec 1;11:e76409. doi: 10.7554/eLife.76409 (PMC9754632; doi:10.7554/eLife.76409)
Supplement: Figure 2—source data 1. — Both surface tension and Young’s modulus were extracted from aggregate profiles using TensioX application. Means, medians. and standard deviations were extracted. [file elife-76409-fig2-data1.xlsx]

## Sheet: Surface tension
		grad (B)=	170	T/m	(calibration 13/11/2019)
	Condition	Date	Aggregate	Mv (A.m^-1)	c (m^-2)	Gamma (mN/m)	γ avg (mN/m)	γ std (mN/m)	N
	CTL (DMEMc)	2019-11-15	2	268.767	472380	96.7237	126.482	41.1847	11
			5	250.443	797430	53.3906
		2019-12-03	9	438.877	560760	133.05
		2020-01-16	1	290.005	531700	92.723
			8	302.17	258270	198.896
			9	317.888	366540	147.435
		2019-07-05	7	532.756	506970	178.647
			8	515.791	728850	120.305
			9	543.278	956230	96.5848
		2019-12-20	7	366.179	459400	135.504
			8	356.707	439280	138.044
	[Latrunculin A] (µM)	Date	Aggregate	Mv (A.m^-1)	c (m^-2)	Gamma (mN/m)	γ avg (mN/m)	γ std (mN/m)	N
	0.15	2019-12-03	4	401.168	797470	85.5186	61.0216	19.9851	6
			5	415.105	865240	81.5588
			8	469.646	1819300	43.8849
		2020-01-16	2	330.728	842860	66.706
			5	306.153	1.0253e+06	50.7618
			6	295.256	1331400	37.6998
	0.25	2019-11-15	1	292.856	3031700	16.4216	27.749	16.0017	6
			4	207.109	3036100	11.5966
		2019-12-03	2	394.504	1363400	49.1901
			3	372.583	1373600	46.1117
		2020-01-16	3	338.888	3102500	18.5692
			4	358.371	2476100	24.6045
	[EGTA] (mM)	Date	Aggregate	Mv (A.m^-1)	c (m^-2)	Gamma (mN/m)	γ avg (mN/m)	γ std (mN/m)	N
	2.5	2019-07-05	2	411.143	2769500	25.2372	21.9221	6.11553	6
			3	331	3079500	18.2724
		2019-12-20	1	334.326	3668000	15.4949
			2	353.669	1845800	32.5732
			3	339.105	2949200	19.5469
			4	354.498	2953000	20.408

## Sheet: Young's modulus
	[EGTA] (mM)	Date	Aggregate	2L (pixels)	2 L ( µm)	L ( µm)	R (µm)	fv (N.m^-3)	E (Pa)	E avg	E std	N
	2.5	2019-07-05	2	447	968.231	484.116	575.09	69894.3	158.763	154.407	27.8104	6
			3	434	940.072	470.036	555.054	56289.7	121.224
		2019-12-20	1	426	867.617	433.809	541.242	56835.4	140.768
			2	428	871.69	435.845	588.086	60123.7	204.655
			3	406	826.884	413.442	527.495	57647.8	148.807
			4	410	835.031	417.515	528.513	60264.7	152.223
	Condition	Date	Aggregate	2L (pixels)	2 L ( µm)	L ( µm)	R (µm)	fv (N.m^-3)	E (Pa)	E avg	E std	N
	CTL (DMEM c)	2019-07-05	7	241	522.022	261.011	545.848	69870	1312.67	1342.91	476.421	11
			8	199	431.047	215.523	505.235	87684.4	1344.69
			9	NA				92357.3	NA
		2019-12-20	7	208	423.625	211.813	561.1	62250.4	1529.88
			8	241	490.835	245.418	591.65	60640.2	1184.44
		2020-01-16	1	217	424.242	212.121	572.825	49300.8	1310.39
			8	190	371.457	185.728	550.342	51368.9	1733.04
			9	188	367.546	183.773	528.348	54040.9	1598.7
		2019-11-15	2	217	367.174	183.587	417.513	45690.3	528.673
			5	191	323.181	161.591	442.47	42575.3	911.292
		2019-12-03	1	238	434.703	217.352	615.982	70981.6	2344.98
			9	276	504.11	252.055	545.662	74609.1	973.225
	[Latrunculin A] (µM)	Date	Aggregate	2L (pixels)	2 L ( µm)	L ( µm)	R (µm)	fv (N.m^-3)	E (Pa)	E avg	E std	N
	0.15	2019-12-03	4	433	790.868	395.434	650.228	68198.5	464.545	578.268	113.645	6
			5	339	619.178	309.589	609.589	70567.9	773.767
			8	344	628.311	314.155	566.667	79839.8	625.617
		2020-01-16	2	309	604.106	302.053	565.494	56223.8	491.579
			5	272	531.769	265.885	549.365	52046.1	594.24
			6	275	537.634	268.817	540.567	50193.5	519.859
	0.25	2019-11-15	1	408	690.355	345.178	453.469	49785.5	120.608	188.539	86.3871	6
			4	382	646.362	323.181	475.465	35208.5	125.602
		2019-12-03	2	467	852.968	426.484	619.178	67065.7	299.41
			3	469	856.621	428.311	629.224	63339.1	297.733
		2020-01-16	3	374	731.183	365.591	490.225	57611	160.439
			4	439	858.26	429.13	514.663	60923.1	127.443
