# Supplementary material for: The importance of intermediate filaments in the shape maintenance of myoblast model tissues
Source: eLife. 2022 Dec 1;11:e76409. doi: 10.7554/eLife.76409 (PMC9754632; doi:10.7554/eLife.76409)
Supplement: Figure 2—source data 2. — ±-Blebbistatin was used at different concentrations. Both surface tension and Young’s modulus were extracted from the aggregates profiles using TensioX application. Means, medians, and standard deviations were extracted for each condition and compared. [file elife-76409-fig2-data2.xlsx]

## Sheet: Surface tension
Date	[(±)-Blebbistatin] (µM)	Aggregate	c (m^-2)	c Average	c standard deviation	Mv (A.m-1)	Gamma (mN/m)	Gamma avg	Gamma std	N
2020-03-04	0	2	166110			274.706	281.139
	0	6	343450			274.706	135.973
2020-03-11	0	1	306680			252.854	140.163
	0	11	215450			252.854	199.513
2020-03-13	0	15	185720			226.214	207.067
	0	16	212550			226.214	180.929
2020-05-29	0	17	639960	295703	164903	403.109	107	178.838	57.9888	7
2020-03-04	5	1	269500			274.706	173.284
	5	4	255300			274.706	182.922
2020-03-11	5	2	304780			252.854	141.037
	5	9	309320			252.854	138.967
	5	10	259130	279606	25636.1	252.854	165.883	160.418	19.6062	5
2020-03-04	10	3	552529			274.706	84.5204
2020-03-11	10	3	427270			252.854	100.604
	10	7	384900			252.854	111.679
	10	8	407810			252.854	105.405
2020-03-13	10	1	648230	484148	112374	226.214	59.3253	92.3067	21.0005	5
2020-03-13	20	2	771210			226.214	49.8651
	20	3	849330			226.214	45.2786
	20	12	535100			226.214	71.8678
	20	13	724860			226.214	53.0536
	20	14	535570			226.214	71.8047
2020-06-05	20	6	2308200			445.516	32.8125
	20	7	1872700			445.516	40.4431
	20	8	1292500	1.11118e+06	659245	445.516	58.5978	52.9654	14.0184	8
2020-03-11	40	4	1628300			252.854	26.3988
	40	5	1578900			252.854	27.2247
	40	6	1716600			252.854	25.0409
2020-03-13	40	4	1216500			226.214	31.6124
	40	5	1150900	1458240	256479	226.214	33.4142	28.7382	3.59025	5
2020-03-13	80	6	1673700			226.214	22.9769
	80	7	2.0771e+06			226.214	18.5145
	80	8	2204200			226.214	17.4469
2020-05-29	80	6	6199700			403.109	11.0535
	80	7	6377900	3706520	2.36625e+06	403.109	10.7447	16.1473	5.22184	5
2020-03-13	160	9	1823900			226.214	21.0847
	160	10	2360900			226.214	16.2889
	160	11	2722900			226.214	14.1233
2020-05-29	160	8	5173600			403.109	13.2458
	160	9	6814400	3779140	2.12764e+06	403.109	10.0564	14.9598	4.0915	5
Date	[(+)-Blebbistatin] (µM)	Aggregate	c (m^-2)	c Average	c standard deviation	Mv (A.m-1)	Gamma (mN/m)	Gamma avg	Gamma std	N
2020-05-29	80	3	292390			403.109	234.374
	80	5	803100			403.109	85.3301
	80	10	314110	469867	288793	403.109	218.167	179.29	81.7746	3
2020-05-29	160	2	370850			403.109	184.788
	160	4	742180			403.109	92.3342
	160	11	317540			403.109	215.811
2020-06-05	160	1	251160			445.516	301.552
	160	2	255140			445.516	296.848
	160	3	283870	263390	17847.5	445.516	266.804	226.356	80.0756	6

## Sheet: Young's modulus
Date	[(+/-)-Blebbistatin] (µM)	Aggregate	2L (pixels)	2 L ( µm)	L ( µm)	R (µm)	fv (N.m^-3)	E (Pa)	E avg	E std	N
2020-03-04	0	2	188	401.709	200.855	568.91	46700	1422.52
	0	6	191	408.12	204.06	531.517	46700	1033.53
2020-03-11	0	1	210	455.038	227.519	593.716	42985.2	1068.54
	0	11	204	442.037	221.018	584.507	42985.2	1094.97
2020-03-13	0	15	198	438.053	219.027	591.261	38456.4	1053.92
	0	16	176	389.381	194.69	571.35	38456.4	1308.44
2020-05-29	0	17	156	292.958	146.479	459.155	68528.6	2283.47	1323.63	448.247	7
2020-03-04	5	1	245	523.504	261.752	627.671	46700	952.325
	5	4	256	547.009	273.504	628.205	46700	837.609
2020-03-11	5	2	225	487.541	243.77	586.132	42985.2	825.219
	5	9	236	511.376	255.688	559.047	42985.2	591.822
	5	10	234	507.042	253.521	545.504	42985.2	550.4	751.475	172.568	5
2020-03-04	10	3	229	489.316	244.658	576.923	46700	832.378
2020-03-11	10	3	272	589.382	294.691	609.967	42985.2	547.841
	10	7	258	559.047	279.523	602.384	42985.2	610.616
	10	8	241	522.21	261.105	567.714	42985.2	591.02
2020-03-13	10	1	256	566.372	283.186	563.053	38456.4	401.017	596.574	155.281	5
2020-03-13	20	2	266	588.496	294.248	549.226	38456.4	323.626
	20	3	302	668.142	334.071	573.562	38456.4	263.018
	20	12	222	491.15	245.575	567.478	38456.4	634.486
	20	13	208	460.177	230.088	519.912	38456.4	543.517
	20	14	209	462.389	231.195	527.655	38456.4	568.39
2020-06-05	20	6	360	851.064	425.532	558.511	75737.7	225.347
	20	7	382	903.073	451.537	606.383	75737.7	262.079
	20	8	408	964.539	482.27	606.383	75737.7	215.101	379.446	172.737	8
2020-03-11	40	4	348	754.063	377.031	532.503	42985.2	151.944
	40	5	322	697.725	348.862	528.169	42985.2	185.635
	40	6	331	717.226	358.613	514.085	42985.2	153.387
2020-03-13	40	4	397	878.319	439.159	615.597	38456.4	153.639
	40	5	349	772.124	386.062	581.858	38456.4	180.501	165.021	16.5864	5
2020-03-13	80	6	407	900.442	450.221	584.071	38456.4	115.548
	80	7	432	955.752	477.876	570.243	38456.4	87.7961
	80	8	481	1064.16	532.08	581.858	38456.4	68.9476
2020-05-29	80	6	516	969.014	484.507	503.756	68528.6	91.4246
	80	7	519	974.648	487.324	484.507	68528.6	76.8829	88.12	17.7285	5
2020-03-13	160	9	456	1008.85	504.425	612.279	38456.4	99.2174
	160	10	455	1006.64	503.319	585.177	38456.4	83.3298
	160	11	475	1050.88	525.442	633.85	38456.4	100.821
2020-05-29	160	8	593	1113.62	556.808	504.695	68528.6	60.6852
	160	9	621	1166.2	583.099	509.859	68528.6	55.0374	79.8181	21.2716	5
Date	[(+/-)-Blebbistatin] (µM)	Aggregate	2L (pixels)	2 L ( µm)	L ( µm)	R (µm)	fv	E (Pa)	E avg	E std	N
2020-05-29	80	3	204	383.099	191.549	544.601	68528.6	2020.95
	80	5	164	307.981	153.991	462.911	68528.6	2030.44
	80	10	234	439.437	219.718	561.502	68528.6	1513.18	1854.85	295.937	3
2020-05-29	160	2	205	384.977	192.488	569.953	68528.6	2389.06
	160	4	174	326.761	163.38	489.671	68528.6	2128.64
	160	11	185	347.418	173.709	486.385	68528.6	1724
2020-06-05	160	1	220	520.095	260.047	644.208	75737.7	1747.72
	160	2	232	548.463	274.232	662.53	75737.7	1667.21
	160	3	224	529.551	264.775	622.931	75737.7	1447.61	1850.71	343.479	6
