# Supplementary material for: The importance of intermediate filaments in the shape maintenance of myoblast model tissues
Source: eLife. 2022 Dec 1;11:e76409. doi: 10.7554/eLife.76409 (PMC9754632; doi:10.7554/eLife.76409)
Supplement: Figure 3—source data 1. — Roughness of the different multicellular aggregates was reported and compared. Aggregate contours were first extracted, then the roughness of the contour was calculated. Means, medians, and standard deviations are reported for each condition. [file elife-76409-fig3-data1.xlsx]

## Sheet: Feuil1
Condition	Date	Labelling	n°	Date of imaging	Roughness all (µm)	Roughness (per aggregate) (µm)	Average (µm)	Standard deviation (µm)
DMEM complete - CTL	2019-12-03	DAPI pancadh Siractine	?	2019-12-18	2.2813	2.2813	1.97845	0.396536
	2019-12-20	DAPI Laminin Spyact555	10	2020-07-30	1.4688	1.4688
	2020-01-16	DAPI Laminin Spyact555	11	2020-07-30	2.8407	2.8407
	2020-07-16	DAPI Laminin Spyact555	22	2020-07-30	1.9991
	2020-07-16	DAPI Myosin SPYACT555	22	2020-10-06	1.7033	1.8512
	2020-03-13	DAPI Pancadh SPYACT555	18	2020-10-06	2.0295	2.0295
	2020-12-20	DAPI Pancadh Phalloidin	9	2020-10-28	2.0531	2.0531
	2020-07-16	DAPI Pancadh SPYACT555	23	2020-11-09	1.8138	1.8138
	2020-12-11	DAPI HIFalpha SPY555ACT	4	2021-01-15	1.5132	1.5132
	2020-12-11	DAPI HIFalpha SPY555ACT	1	2021-01-15	2.1277	2.1277
	2020-12-11	DAPI HIFalpha SPY555ACT	3	2021-01-15	1.8052	1.8052
160 µM (+)-Blebbistatin	2020-06-05	DAPI Pancadh SPYACT555	4	2020-10-06	1.9396	1.9396	1.87083	0.339711
	2020-06-05	DAPI Myosin SPYACT555	5	2020-10-06	2.1709	2.1709
	2020-05-29	DAPI Pancadh SPYACT555	21	2020-10-06	1.1916
	2020-05-29	DAPI Myosin SPYACT555	21	2020-10-28	1.8124	1.502
160 µM (+/-)-Blebbistatin	2020-03-13	DAPI Myosin Phalloidin	29	2020-07-07	3.8523	3.8523	3.06849	0.541738
	2020-07-16	DAPI Myosin SPYACT555	24	2020-11-09	2.5061
	2020-07-16	DAPI Pancadh SPYACT555	24	2020-11-09	2.2327
	2020-07-16	Hoechst p-myosin SPY555ACTIN	24	2022-05-20	3.23155	2.65678
	2020-07-16	DAPI Pancadh SPYACT555	25	2020-11-09	2.7655	2.7655
	2020-07-16	DAPI Myosin SPYACT555	26	2020-11-09	2.5635
	2020-07-16	Hoechst pand-cadh SPYACT555	26	2022-05-16	3.43525	2.99937
2,5 mM EGTA	2019-12-20	DAPI Myosin Siractine	6	2020-06-29	4.4857		3.33075	0.35779
	2019-12-20	DAPI Pancadh Siractine	6	2020-07-07	2.3827	3.4342
	2019-12-20	DAPI Pancadh SPY555ACT	2	2021-01-14	2.9726
	2019-12-20	DAPI Myosin SPYACT555	2	2020-11-09	2.6337	2.80315
	2019-12-20	DAPI Pancadh SPY555ACT	4	2021-01-14	3.342
	2019-12-20	DAPI Pancadh SPYACT555	4	2020-11-09	3.8439	3.59295
	2019-12-20	Hoechst p-myosin SPY55ACTIN	1	2022-06-13	3.4927	3.4927
0,25 µM Latrunculin A	2019-12-03	DAPI pancadh Siractine	?	2019-12-18	4.2815	4.2815	6.28982	2.01255
	2019-12-03	DAPI Myosin Phalloidin	3	2020-07-07	4.8192
	2019-12-03	DAPI Pancadh Phalloidin	3	2020-10-28	5.5371	5.17815
	2020-01-16	DAPI Pancadh Phalloidin	16	2020-10-06	9.4298	9.4298
	2020-01-16	dapi_actin_desmin_VERIFCAHIERMR	14	2020-10-28	6.0565
	2020-01-16	DAPI Myosin Phalloidin	14	2020-07-07	7.9678	7.01215
	2020-01-16	Hoechst p-myosin SPY555ACTIN	15	2022-06-13	5.5475	5.5475
