# Supplementary material for: The importance of intermediate filaments in the shape maintenance of myoblast model tissues
Source: eLife. 2022 Dec 1;11:e76409. doi: 10.7554/eLife.76409 (PMC9754632; doi:10.7554/eLife.76409)
Supplement: Figure 3—source data 2. — Local contact angles of cells within an aggregate are manually measured, and the distribution of the local contact angle is given. From the mean surface tension, both tension at the cell–medium and cell–cell medium are deduced. [file elife-76409-fig3-data2.xlsx]

## Sheet: CTL
Local angle (°)			Local angle (°)	Local angle (rad)		Condition	Surface tension g (mN/m)	g average (mN/m)	g standard deviation (mN/m)	N
127.232		Average	146.5	2.5569		DMEM complete - CTL	96.7237	126.482	41.1847	11
145.508		Standard deviation	18.764	0.327494			53.3906
99.2667							328.619
115.261							133.05
108.671							92.723
160.686							198.896
161.306							147.435
140.22							178.647
160.81							120.305
135.157							96.5848
141.613							135.504
112.947							138.044
120.579
166.202
133.281						TCM	177.693	mN/m		Delta(TCM)	97.0032	mN/m
156.561
148.765						TCC eff	51.2113	mN/m		Delta(TCCeff)	55.8185	mN/m
121.852
143.414
130.902					Condition	TCM (mN/m)	deltaTCM (mN/m)	TCC-J/2 ( mN/m)	delta(TCC-J/2) (mN/m)
131.204					CTL	177.693	97.0032	51.2113	55.8185
171.253					160 µM (+)-Blebbistatin	314.042	187.64	87.6855	107.564
123.004					160 µM (+/-)-Blebbistatin	27.7944	18.7634	12.8346	14.6718
138.895					0,25 µM LatA	64.837	74.9496	37.0881	58.9479
144.714					2,5 mM EGTA	56.4399	38.3316	34.5178	32.216
150.182					A21V	135.045	77.1452	42.697	43.9961
142.338					desWT-Cl29 no HS	102.145	52.4646	32.7277	37.3287
141.023					desD399Y-Cl26 no HS	124.477	70.0266	44.01	49.6384
168.541					desWT-Cl29 HS 2h	49.4025	27.499	19.1172	18.7075
170.865					desD399Y-Cl26 HS 2h	88.3072	50.1425	27.8201	31.6049
148.05
170.261
165.017
171.816
161.329
154.069
150.312
153.497
147.83
147.829
159.117
156.105
145.497
121.712
133.869
157.7
153.439
165.795
169.333
158.765
150.852
168.563
140.109
159.179
142.169
123.22
168.32
162.551
171.24
145.714
157.365
148.193
143.22
153.051
161.681
171.73
166.066
148.853
173.489
173.803
143.538
155.424
169.139
173.919
154.055
166.902
172.423
139.655
169.408
143.068
143.053
152.706
163.778
145.902
149.199
131.713
158.549
140.757
125.522
149.622
129.607
135.231
165.755
161.777
169.617
157.871
139.658
145.263
140.775
154.611
130.094
137.66
135.711
158.41
151.589
147.653
147.796
164.136
151.262
148.454
140.612
102.276
110.898
152.135
104.234
106.969
135.338
141.367
142.307
98.4893
129.767
139.022
159.179
150.301
128.68
123.873
151.363
139.668
146.193
165.167
136.742
111.404
103.937
137.818
147.376
96.4848
129.985
100.859
142.433
129.844
151.558
172.569
120.426
144.823
133.493
142.135
137.47
99.9515
113.831
138.86
146.794
139.899
138.295
140.65
147.098
125.959
137.359
148.878
156.48
168.64
166.597
143.614
116.018
135.889
140.296
168.678
136.326
116.446
136.59
134.989
145.401
148.03
87.4508
135.743
65.1331
91.3789
168.241
146.964
158.598
138.982
145.386
130.439
164.431
169.941
144.666
140.292
110.927
86.8861
85.1743
122.627
165.495
125.171
145.052
139.897
156.526
138.731
108.815
146.942
164.929
145.118
144.229
157.394
151.151
158.423
161.952
159.745
102.529
145.434
149.621
150.36
150.324
172.579
143.506
149.859
135.244
167.684
135.813
167.193
142.161
172.512
119.982
151.239
144.68
137.078
148.141
136.848
136.004
142.058
157.951
148.821
163.313
155.627
148.354
166.675
169.579
157.453
165.861
165.964
158.946
170.329
151.886
158.902
140.711
135.809
155.178
150.416
173.779
175.815
111.389
142.688
158.731
168.471
141.52
133.123
133.091
147.403
136.565
175.74
122.64
158.877
177.388
147.542
150.148
154.894
173.76
158.477
171.85
178.354
139.554
167.673
156.635
154.511
150.663
166.282
136.193
146.018
154.17
122.455
132.531
159.444
110.095
153.004
164.438
117.715
131.219
178.241
125.744
99.8061
115.947
119.157
150.799
150.22
168.256
119.762
140.276
121.495
154.359
93.6772
114.624
131.149
129.772
134.718
157.698
150.096
106.928
148.645
118.111
128.341
121.969
125.178
166.186
116.022
128.858
158.369
133.931
127.444
144.115
145.049
141.627
154.821
159.146
110.317
142.031
136.645
123.407
143.858
152.347
166.851
159.291
125.742
141.923
121.988
146.433
159.797
132.284
159.88
159.578
165.641
167.934
142.848
157.507
147.013
138.32
162.506
149.514
160.71
141.727
139.05
153.435
158.199
150.967
149.859
147.152
138.013
150.255
149.829
150.068
153.992
132.138
150.767
141.843
158.791
155.556
158.258
166.524
168.559
177.663
135.547
163.767
148.112
166.675
158.547
159.665
149.931
167.745
153.001
145.238
149.982
147.678
128.811
148.431
147.734
146.768
153.61
154.231
138.96
151.39
158.003
167.164
155.45
156.437
150.327
162.897
165.139
179.174
179.803
146.517
171.741
142.832
153.435
157.866
153.229
154.103
142.094
145.109
142.579
168.853
133.493
154.891
167.102
166.329
170.735
176.865
158.77
169.165
152.485
170.961
147.214
140.914
141.741
136.538
158.477
160.698
146.802
166.032
139.279
65.7723
79.3803
149.661
149.036
148.392
145.392
137.837
162.674
143.677
158.11
164.578
156.501
140.541
147.265
151.928
137.911
132.321
140.141
169.859
159.972
152.055
122.359
156.595
154.892
161.533
163.142
168.111
149.036
174.787
163.968
147.5
158.543
165.223
144.167
139.6
168.05
159.907
139.656
130.725
153.034
145.328
158.962
155.376
164.233
148.57
176.614
172.115
137.838

## Sheet: 160 µM (+)-Bleb
Local angle (°)			Local angle (°)	Local angle (rad)			[(+)-Blebbistatin] (µM)	Surface tension g (mN/m)	g average (mN/m)	g standard deviation (mN/m)	N
169.794		Average	147.573	2.57564		2020-05-29	160	184.788
172.736		Standard deviation	20.9658	0.365922			160	92.3342
164.374							160	215.811
167.574						2020-06-05	160	301.552
179.474							160	296.848
122.895							160	266.804	226.356	80.0756	6
158.306
108.731						TCM	314.042	mN/m	Delta(TCM)	187.64	mN/m
152.283
150.597						TCC eff	87.6855	mN/m	Delta(TCCeff)	107.564	mN/m
163.064
127.143
148.618
124.944
124.495
147.433
126.538
137.079
172.564
152.599
178.795
173.062
157.26
120.379
122.701
132.665
173.234
138.221
133.826
160.792
155.792
172.053
162.517
168.432
163.443
159.206
139.111
148.57
156.465
174.539
169.765
164.189
166.26
176.582
167.745
140.845
146.244
113.424
175.286
171.969
148.305
169.569
145.846
160.56
180
172.111
147.583
153.503
155.322
170.991
120.117
148.031
170.132
166.866
150.412
160.084
120.388
111.831
154.747
137.67
132.274
179.298
142.872
163.835
168.743
149.47
170.758
156.764
162.897
130.52
164.492
137.564
126.748
142.322
155.431
166.074
167.264
175.978
154.25
144.808
163.61
125.022
137.41
122.896
145.363
146.646
174.443
155.184
138.712
175.584
145.863
144.127
138.375
129.266
162.671
157.554
109.186
154.351
177.55
171.1
153.387
175.469
159.357
179.769
142.408
169.909
170.485
153.435
120.46
168.543
132.79
134.732
159.321
144.162
149.036
130.426
130.365
165.533
162.897
155.402
164.819
160.986
142.062
148.707
170.662
118.989
153.031
145.259
75.6236
154.236
150.734
166.081
161.996
150.688
129.448
156.057
154.942
149.809
162.775
147.811
145.107
140.205
148.249
145.683
170.407
171.511
158.626
171.957
158.503
151.164
139.5
144.804
134.66
136.848
132.888
142.056
96.0218
125.372
130.135
162.696
155.949
119.555
142.91
129.821
148.205
154.644
174.133
145.319
141.267
151.361
159.08
145.426
157.166
167.463
141.17
137.575
144.162
143.626
119.253
122.235
151.347
130.956
153.435
127.304
135.751
140.004
149.349
131.634
149.036
136.559
147.724
111.165
167.962
163.675
147.313
106.474
132.429
135.269
134.597
170.496
141.18
146.31
152.047
140.019
111.501
127.569
129.038
89.7031
146.17
99.3396
136.77
140.105
166.264
155.518
114.595
91.9306
108.435
151.368
163.359
158.629
153.18
174.851
169.216
161.815
173.781
170.172
162.89
144.008
140.515
107.208
143.859
138.697
155.278
137.652
160.145
164.982
172.741
83.6158
98.6525
153.866
159.528
109.335
30.3027
163.241
132.773
157.166
155.626
154.855
128.915
136.273
171.573
146.066
82.1959
92.153
142.897
157.529
176.741
169.021
152.021
138.958
158.074
145.156
159.111
117.897
158.17
160.408
147.339
137.767
133.697
156.308
168.73
135.18
120.689
142.866
137.905
145.536
165.833
152.41
165.022
140.711
172.747
157.903

## Sheet: 160 µM (+-)-Bleb
Local angle (°)			Local angle (°)	Local angle (rad)			[(+/-)-Blebbistatin] (µM)	Surface tension g (mN/m)	g average (mN/m)	g standard deviation (mN/m)	N
117.867		Average	124.998	2.18162		2020-03-13	160	21.0847
141.582		Standard deviation	27.9234	0.487355			160	16.2889
119.871							160	14.1233
178.044						2020-05-29	160	13.2458
111.321							160	10.0564	14.9598	4.0915	5
74.1161
164.524						TCM	27.7944	mN/m			Delta(TCM)	18.7634	mN/m
123.491
117.272						TCC eff	12.8346	mN/m			Delta(TCCeff)	14.6718	mN/m
140.859
123.453
105.068
101.01
169.974
100.305
107.919
118.926
83.7289
105.255
67.8337
114.305
173.948
116.565
136.005
121.335
102.907
103.314
106.155
155.28
135.097
124.794
153.538
159.146
163.474
170.011
157.549
110.556
103.351
162.309
159.305
167.486
152.412
120.075
38.3749
82.7857
167.276
135.397
134.635
86.9872
92.9737
83.6598
138.759
164.069
124.38
173.718
125.004
82.9695
121.542
133.766
144.33
104.931
153.278
128.254
180
113.749
143.098
117.004
136.848
130.83
70.6067
147.359
112.157
135
103.069
99.5691
130.718
150.345
144.293
130.021
127.85
76.4601
51.961
149.991
151.223
107.819
161.75
105.201
142.645
100.879
138.366
102.829
170.754
116.871
152.241
108.861
125.407
153.435
112.131
142.825
114.22
105.808
145.892
111.61
176.734
152.447
167.064
136.768
142.23
140.389
143.344
70.781
101.31
111.691
142.25
90.1462
158.063
137.654
114.528
168.179
129.35
94.2446
106.653
163.572
120.819
134.629
127.74
101.911
161.565
103.57
148.325
176.481
122.869
98.7567
138.965
144.462
95.6405
117.277
90
126.746
135.988
137.169
142.815
160.074
157.234
169.974
117.377
166.329
167.358
108.135
115.652
151.607
44.4578
103.621
122.939
51.9728
135.785
154.68
175.601
106.336
70.6667
168.69
173.991
145.554
158.003
133.261
155.674
153.435
126.518
152.22
95.5658
155.499
109.047
156.011
86.6335
117.026
131.623
137.045
139.764
137.53
150.559
147.729
146.908
120.733
121.379
117.004
176.689
149.629
107.568
86.8091
90.113
41.4677
95.4403
118.451
116.565
95.4403
152.197
125.453
93.1533
66.1613
121.364
60.2421
101.733
136.957
137.153
105.43
118.797
119.416
136.157
164.303
157.62
99.613
98.13
146.281
153.353
111.251
130.126
135.306
130.365
120.387
120.964
82.057
146.31
156.892
116.131
140.498
91.102
96.182
113.411
141.651
148.245
87.58
99.806
76.557
149.732
134.839
70.484
110.072
100.821
127.635
120.316
98.475
91.975
97.414
135
139.926
118.053
134.344
130.328
131.615
97.696
109.069
122.765
95.11
143.509
111.62
109.945
106.504
123.69
87.227
69.037
141.694
144.209
134.011
129.236
142.551
149.036
129.034
125.447
118.474
123.111
107.988
138.445
117.031
127.569
139.162
103.241
118.496
144.268
97.282
114.864

## Sheet: 0,25 µM LatA
Local angle (°)			Local angle (°)	Local angle (rad)		[Latrunculine A] (µM)	Surface tension g (mN/m)	g average (mN/m)	g standard deviation (mN/m)	N
139.611		Average	110.218	1.92366		0.25	16.4216	27.749	16.0017	6
140.312		Standard deviation	34.6374	0.604537			11.5966
131.269							49.1901
174.034							46.1117
167.471							18.5692
66.0775							24.6045
103.145
162.255						TCM	64.837	mN/m		Delta(TCM)	74.9496	mN/m
138.366
108.311						TCC eff	37.0881	mN/m		Delta(TCCeff)	58.9479	mN/m
149.744
124.486
143.427
135.196
141.524
135.644
150.327
127.917
116.565
120.324
94.9952
55.8139
126.833
130.437
104.036
89.6463
99.6375
102.594
64.179
88.0908
86.0244
130.254
73.5364
132.064
86.1494
115.801
174.837
50.0151
85.0581
160.352
113.02
147.345
92.3533
75.0111
173.445
73.8608
142.696
100.923
69.8697
66.4477
97.6507
138.61
102.116
145.176
117.984
79.5085
108.02
139.399
132.259
130.775
150.137
125.2
103.241
145.906
154.543
143.569
124.824
149.457
49.2974
121.629
172.875
161.799
118.993
147.223
144.512
138.909
117.397
158.025
112.928
112.098
144.782
29.7449
90
118.843
106.928
45.8013
27.6939
43.2643
48.7769
57.0948
61.0323
128.148
72.394
126.486
106.015
95.7106
141.34
116.301
146.889
111.346
80.8161
111.161
98.7462
136.848
44.8671
95.9974
49.9503
92.7187
153.947
161.15
139.723
110.722
68.0394
102.653
79.9393
63.2483
133.182
165.409
118.986
102.827
31.8094
118.82
104.123
115.962
124.388
92.4195
100.48
119.745
123.111
92.0594
177.205
95.1245
127.694
111.801
135.242
75.4655
99.1283
79.4127
67.0588
122.005
72.3211
123.69
91.2707
116.667
115.584
117.408
41.2624
96.3797
141.183
67.751
158.112
95.6964
104.036
94.6355
48.3665
45.947
155.925
107.292
63.1038

## Sheet: 2,5 mM EGTA
Local angle (°)			Local angle (°)	Local angle (rad)		[EGTA] (mM)	Surface tension g (mN/m)	g average (mN/m)	g standard deviation (mN/m)	N
93.077		Average	104.592	1.82547		2.5	25.2372	21.9221	6.11553	6
132.4		Standard deviation	22.5134	0.392933			18.2724
99.09							15.4949
118.435							32.5732
110.417							19.5469
108.999							20.408
136.97
91.909						TCM	56.4399	mN/m	Delta(TCM)	38.3316	mN/m
141.613
113.086						TCC eff	34.5178	mN/m	Delta(TCCeff)	32.216	mN/m
130.786
113.962
88.995
111.93
112.521
80.655
101.31
112.122
101.781
76.154
119.055
143.735
103.377
95.262
104.931
94.764
119.055
141.943
127.393
83.66
90
113.552
125.272
121.809
71.131
105.068
92.42
108.435
132.825
122.164
135
81.18
97.125
126.87
60.362
118.142
98.13
116.996
63.768
90.535
107.616
90
119.197
136.937
119.055
75.343
101.889
119.745
135.431
119.638
120.018
83.66
90
154.231
81.87
130.236
117.031
94.055
63.625
66.161
117.408
106.928
66.425
58.955
49.028
92.726
110.695
66.801
117.897
112.698
106.39
94.814
85.113
77.537
120.964

## Sheet: A21V no HS
Local angle (°)			Local angle (°)	Local angle (rad)
128.98		Average	143.137	2.49822				Condition	Surface tension g (mN/m)	g average (mN/m)	g standard deviation (mN/m)	N
140.194		Standard deviation	17.5354	0.30605				A21V	81.3245	92.3485	33.1491	9
148.761									88.572
115.478									115.353
145.109									50.5048
150.062									101.823
139.41									116.127
143.2									153.458
143.13									70.4038
154.006									53.5695
149.556
132.58
128.616								TCM	135.045	mN/m	Delta(TCM)	77.1452	mN/m
151.95
165.069								TCC eff	42.697	mN/m	Delta(TCCeff)	43.9961	mN/m
153.555
123.554
138.752
140.304
137.896
117.408
154.491
113.259
148.241
121.065
100.784
121.535
126.787
123.219
138.614
111.801
126.084
112.485
126.744
111.961
120.964
105.001
136.939
142.53
146.31
148.655
104.036
126.87
136.526
143.952
124.846
148.861
145.548
136.37
138.282
135.546
154.654
154.654
133.941
162.474
143.381
154.954
133.152
148.671
151.783
150.965
137.275
159.717
151.223
158.405
158.682
127.194
154.477
155.556
104.036
152.354
145.209
143.842
137.257
143.438
144.273
135
132.51
152.422
130.601
158.199
160.017
150.604
102.642
153.435
164.143
153.869
144.462
101.31
150.218
148.285
151.928
131.538
133.798
143.915
77.5741
152.969
143.427
123.97
133.781
133.103
145.739
173.904
157.139
125.779
126.416
142.001
149.036
126.293
136.005
163.301
133.176
149.328
151.699
138.731
164.694
146.31
143.336
156.801
163.072
119.745
132.901
154.44
141.189
156.753
130.601
148.392
170.713
153.295
174.459
135
143.267
151.809
137.564
151.274
151.209
134.421
153.435
144.775
152.18
153.065
150.035
142.9
150.471
152.216
139.874
178.21
135
163.072
166.366
162.265
144.728
150.255
149.668
158.199
158.199
146.182
144.246
151.371
142.821
156.371
150.945
155.087
136.032
150.709
161.565
160.56
163.74
132.936
105.683
137.603
133.21
119.745
142.125
142.643
128.948
147.754
148.465
145.524
135.785
144.68
143.13
162.408
154.799
169.695
157.62
152.794
153.435
150.709
122.835
103.241
105.895
143.973
150.945
144.221
131.634
172.875
146.908
154.654
149.544
163.926
177.6
165.964
159.724
144.545
151.928
143.746
142.696
158.839
151.928
126.87
149.036
164.055
145.305
63.4349
150.018
160.523
178.375
112.249
148.134
145.408
141.34
51.3402
128.66
135
128.66
141.938
144.982
143.973
142.125
158.199
159.034
153.75
152.488
157.38
149.712
151.06
117.897
175.684
163.496
152.223
141.34
127.712
144.709
138.595
160.017
139.399
115.747
116.565
141.938
124.992
142.125
137.564
157.38
158.682
146.363
141.654
169.771
165.624
150.131
139.316
159.165
144.273
139.268
127.763
153.435
154.592
131.634
149.47
142.058
169.695
153.435
142.8
168.566
165.069
149.036
162.897
150.67
149.323
152.08
145.061
160.56
151.274
87.5104
110.204
147.724
111.371
145.176
156.187
150.792
139.764
138.855
124.759

## Sheet: desWT-Cl29 no HS
Local angle (°)			Local angle (°)	Local angle (rad)		Condition	Surface tension g (mN/m)	g average (mN/m)	g standard deviation (mN/m)	N
150.255		Average	142.625	2.48928		desWT-Cl29 no HS	87.6562	69.4168	15.136	10
126.87		Standard deviation	24.3001	0.424117			86.2273
177.549							84.5107
120.53							74.0186
169.992							63.73
86.4552							75.6468
169.695							43.5698
130.805							62.805
150.087							66.7792
165.104							49.2248
140.141
167.196
160.587						TCM	102.145	mN/m	Delta(TCM)	52.4646	mN/m
161.001
143.227						TCC eff	32.7277	mN/m	Delta(TCCeff)	37.3287	mN/m
162.092
146.776
116.267
131.634
164.327
136.816
84.2666
115.201
104.263
137.272
123.111
138.608
145.763
157.028
160.181
138.691
94.7556
177.274
127.819
95.6957
103.001
136.861
76.153
146.041
141.23
153.488
111.084
114.146
117.784
176.583
162.181
172.61
146.104
165.747
115.195
97.1451
118.19
95.3051
89.5917
156.991
136.343
174.955
82.1743
154.551
123.256
171.027
159.396
150.421
172.504
178.062
147.676
134.335
129.171
119.381
140.66
133.811
152.45
133.575
122.137
130.819
126.392
147.085
144.903
131.1
99.4517
165.687
149.552
141.733
155.49
127.364
131.067
139.173
168.591
156.79
126.298
143.227
153.435
155.611
171.61
153.508
156.038
177.055
76.0139
111.155
126.87
163.496
166.481
159.444
135.647
147.085
144.246
144.64
152.855
145.408
133.176
140.634
151.252
179.858
170.745
147.579
141.779
129.222
145.467
156.211
163.839
165.069
174.265
164.534
152.194
149.036
174.231
158.635
164.103
170.727
170.727
166.631

## Sheet: desD399Y-Cl26 no HS
Local angle (°)			Local angle (°)	Local angle (rad)
178.091		Average	138.59	2.41885			Condition	Surface tension g (mN/m)	g average (mN/m)	g standard deviation (mN/m)	N
160.21		Standard deviation	24.4855	0.427352			desD399Y-Cl26 no HS	103.654	80.4673	20.3882	9
131.332								38.3925
158.423								94.4362
126.027								95.8264
139.373								83.274
156.251								68.3863
178.707								64.1928
138.629								82.8427
147.561								93.2009
154.654
119.334
166.027
162.181							TCM	124.477	mN/m	Delta(TCM)	70.0266	mN/m
173.98
122.848							TCC eff	44.01	mN/m	Delta(TCCeff)	49.6384	mN/m
147.529
133.137
123.766
139.862
149.657
177.346
150.855
146.049
101.982
149.07
157.268
161.687
154.424
163.099
170.896
158.839
149.679
178.568
124.824
180
163.756
154.564
173.935
171.66
114.431
150.861
151.958
169.902
169.298
169.298
168.69
163.093
180
162.133
158.776
165.282
72.7042
176.905
162.747
146.037
163.355
167.218
177.192
147.196
162.055
128.747
158.785
156.756
156.035
152.985
156.013
157.569
155.695
135.997
140.326
159.829
121.675
127.108
156.869
138.771
138.636
138.262
151.841
132.839
144.361
121.019
124.205
132.187
109.357
98.471
155.759
143.79
166.247
154.161
157.431
153.485
162.897
135.951
140.392
163.031
140.972
133.993
82.441
103.37
102.071
149.767
114.945
144.068
134.875
134.441
130.064
131.035
116.565
141.94
132.337
107.671
93.219
89.049
135.129
147.829
112.249
113.672
110.42
134.48
141.271
138.838
138.84
134.215
141.096
157.029
137.281
137.284
144.663
139.915
123.606
117.153
142.15
142.581
61.89
130.961
136.254
105.319
113.673
108.582
113.962
141.958
77.887
110.424
126.187
79.046
121.462
141.896
136.859
128.582
96.911
131.154
111.621
145.546
133.372
141.009
106.583
134.759
162.408
126.441
139.563
85.074
108.435
112.971
132.986
82.807
125.863
75.42

## Sheet: A21V HS 2h
Local angle (°)			Local angle (°)	Local angle (rad)
157.664		Average	146.613	2.55887				Condition	gamma(mN/m)	Gamma moy	Gamma ecart type	N
164.578		Standard deviation	21.6114	0.37719				A21V HS 2h	39.0478	14.5696	8.51218	12
172.461									21.0439
168.078									14.7865
127.747									12.4609
164.529									10.2237
169.39									9.37578
168.172									8.81062
154.526									6.94196
156.6									12.0283
144.764									13.4058
174.498									12.0393
179.5									14.6712
165.881
165.374								TCM	20.4416	mN/m		Delta(TCM)	17.1237	mN/m
142.745
161.834								TCC eff	5.87193	mN/m		Delta(TCCeff)	8.61156	mN/m
126.87
163.74
166.201
113.282
147.995
139.359
143.13
166.293
125.933
143.13
168.857
142.577
157.703
160.048
149.574
146.821
127.512
159.31
123.111
126.336
167.114
156.359
157.879
147.095
138.013
162.499
158.199
164.745
168.479
177.994
168.167
161.565
149.851
166.887
137.911
171.656
116.042
175.556
150.91
156.236
146.31
156.049
149.676
127.488
142.561
161.659
146.626
164.633
180
125.91
155.556
148.458
119.143
134.018
140.026
147.291
126.242
168.573
158.363
143.518
178.467
160.866
143.678
140.194
161.246
170.027
161.717
168.69
136.296
176.055
130.601
154.654
149.727
156.102
170.185
160.864
177.064
162.575
153.435
155.13
163.695
157.433
153.613
150.537
98.2913
140.404
167.347
105.709
126.87
128.333
126.87
123.241
164.33
126.7
155.589
155.519
139.874
118.447
150.255
145.569
160.468
167.655
170.918
149.036
131.689
166.945
149.785
150.642
129.094
174.207
172.298
164.087
178.603
175.329
138.814
172.875
138.18
122.471
167.164
74.0546
111.441
129.898
170.991
144.885
145.505
152.484
105.632
138.617
165.964
153.159
155.376
158.199
151.645
134.474
137.581
176.978
158.749
171.87
136.655
132.917
80.4821
93.0128
129.307
151.821
154.654
167.196
121.333
141.684
130.068
150.03
147.339
122.735
115.67
155.556
115.633
149.47
175.066
145.253
110.917
139.461
136.79
128.194
118.079
129.342
163.926
160.279
146.441
172.666
132.616
131.664
163.25
169.54
144.071
114.444
146.467
78.6901
131.309
137.078
120.324
168.111
135.517
63.8041
121.208
139.447
130.03
88.4089
126.384
169.446
165.339
175.192
126.274
94.9811
147.409
162.57
148.749
131.89
114.444
116.961
147.642
134.384

## Sheet: desWT-Cl29 HS 2h
Local angle (°)			Local angle (°)	Local angle (rad)
128.963		Average	134.468	2.34691		Condition	Surface tension g (mN/m)	g average (mN/m)	g standard deviation (mN/m)	N
149.413		Standard deviation	20.291	0.354145		desWT-Cl29 HS 2h	15.2189	30.2853	8.79143	9
140.74							18.9983
108.394							31.8139
145.167							30.4396
167.413							38.3191
97.722							42.2106
120.444							32.1466
132.906							36.5725
142.125							26.8484
131.505
134.459
124.884						TCM	49.4025	mN/m	Delta(TCM)	27.499	mN/m
123.961
155.056						TCC eff	19.1172	mN/m	Delta(TCCeff)	18.7075	mN/m
136.533
122.905
77.65
120.793
125.801
129.094
138.808
124.305
88.344
123.471
138.205
150.015
147.381
143.746
143.908
156.125
142.253
145.836
156.543
160.346
126.87
120.466
151.587
158.296
159.274
149.676
126.946
136.909
131.424
140.105
154.791
155.832
120.659
132.51
148.241
160.53
141.597
147.208
153.435
164.055
159.88
108.435
127.875
126.82
131.424
115.021
160.335
114.833
130.613
136.245
124.418
120.529
133.315
162.826
168.237
138.006
151.449
150.524
141.911
131.553
125.961
162.696
122.152
142.92
84.401
152.354
118.124
134.825
100.516
124.588
140.824
152.249
153.066
147.51
143.677
141.659
117.521
132.064
143.056
151.592
149.265
133.394
128.367
85.151
156.702
74.222
128.257
135.579
119.745
141.623
96.538
128.072
135.12
128.341
115.279
149.869
129.321
123.46
102.833
91.34
120.51
131.241
132.527
121.759
154.218
159.528
133.872
156.328
111.595
164.696
147.444
151.029
63.435
133.927
164.635

[truncated: 1 more sheets: desD399Y-Cl26 HS 2h]
