# Supplementary material for: The importance of intermediate filaments in the shape maintenance of myoblast model tissues
Source: eLife. 2022 Dec 1;11:e76409. doi: 10.7554/eLife.76409 (PMC9754632; doi:10.7554/eLife.76409)
Supplement: Figure 4—source data 1. — Both surface tension and Young’s modulus were extracted from the profile of aggregates made of either control A21V, desWT-Cl29, or desD399Y-Cl26 cells using TensioX application. Means, medians, and standard deviations were extracted for each cell type and compared. [file elife-76409-fig4-data1.xlsx]

## Sheet: Surface tension
			grad(B) (T/m)		170
Condition	Date	Aggregate	c (m^-2)	Mv (A.m^-1)	Mv moyen (A.m^-1)	fv (N.m^-3)	gamma(mN/m)	Gamma avg	Gamma std	N
desWT-Cl29 no HS	2020-01-24	3	297730	153.517	153.517	26097.9	87.6562	69.4168	15.136	10
		4	262880	133.338	133.338	22667.4	86.2273
		6	292000	145.16	145.16	24677.1	84.5107
		8	348150	151.586	151.586	25769.6	74.0186
	2020-07-03	1	541160	186.051	202.871	34488.1	63.73
		2	455910	209.711		34488.1	75.6468
		3	791560	212.852		34488.1	43.5698
		8	549130			34488.1	62.805
		9	516450			34488.1	66.7792
	2020-06-19	11	715360	207.138	207.138	35213.5	49.2248
desD399Y-Cl26 no HS	2020-01-24	1	374050	228.069	228.069	38771.8	103.654	80.4673	20.3882	9
		2	1016000	229.452	229.452	39006.8	38.3925
		5	413520	229.713	229.713	39051.2	94.4362
		7	491420	277.006	277.006	47091	95.8264
	2020-06-26	6	712770	312.254	349.148	59355.2	83.274
		7	867940	386.042		59355.2	68.3863
		8	924640			59355.2	64.1928
	2020-06-19	8	569830	277.13	277.684	47206.2	82.8427
		9	506500	278.238		47206.2	93.2009
A21V no HS	2020-07-03	14	772450	369.524	369.524	62819.1	81.3245	92.3485	33.1491	9
		15	780020	406.399	406.399	69087.9	88.572
	2020-07-10	15	431590		292.855	49785.4	115.353
		16	997910	296.466	296.466	50399.2	50.5048
		17	482910	289.244	289.244	49171.5	101.823
	2020-07-24	1	392740	268.28	268.28	45607.5	116.127
		2	317180	286.317	286.317	48674	153.458
		3	744700	308.41	308.41	52429.7	70.4038
	2022-05-13	6	583550	183.885	183.885	31260.5	53.5695
desWT-Cl29 HS 30 min	2020-02-21	1	936800	253.609	302.179	51370.4	54.836	41.0163	21.6041	10
		3	727220	357.89		51370.4	70.6394
		5	940780	295.037		51370.4	54.604
		7	818280			51370.4	62.7785
	2020-06-26	1	1718300	204.778	214.296	36430.2	21.2013
		2	2165500	223.813		36430.2	16.823
		3	2376900			36430.2	15.3268
		4	2229700			36430.2	16.3386
	2020-07-10	12	1046600	255.752	255.752	43477.8	41.542
		13	775370	265.91		43477.8	56.0737
desD399Y-Cl26 HS 30 min	2020-02-21	2	820010	489.871	479.77	81561	99.4634	77.08	29.0224	8
		4	1475800	506.111		81561	55.2656
		8	923740			81561	88.2943
	2020-07-03	10	775920	421.835	421.835	71711.9	92.4218
	2020-07-10	7	1166000	386.141	386.141	65644.1	56.2985
		8	536060	401.494	401.494	68253.9	127.325
	2020-07-24	4	1582400	458.77	458.77	77990.9	49.2865
		5	1561800	443.593	443.593	75410.8	48.2845
A21V HS 30 min	2022-04-22	1	1269800	92.5952	92.5952	15741.2	12.3966	25.675	12.0873	12
		2	816590	111.662	111.662	18982.5	23.2461
		3	1543400	138.816	138.816	23598.7	15.2901
		5	1280600	55.7768	55.7768	9482.06	7.40439
		6	1019700	99.2451	99.2451	16871.7	16.5457
	2022-04-29	1	1232200	239.008	239.008	40631.4	32.9747
		2	1196600	186.454	186.454	31697.3	26.4894
		3	1197700	236.872	236.872	40268.2	33.6213
		4	1113800	243.081	243.081	41323.8	37.1016
	2022-05-06	8	1505000	266.726	266.726	45343.3	30.1285
		9	1933400	253.68	253.68	43125.6	22.3056
		10	1018300	303.071	303.071	51522.1	50.5962
desWT-Cl29 HS 2h	2020-01-31	2	1754900	157.103	157.103	26707.6	15.2189	30.2853	8.79143	9
		3	1490900	166.615	166.615	28324.6	18.9983
		4	912530	170.772	170.772	29031.2	31.8139
	2020-06-19	1	1534800	272.65	274.816	46718.7	30.4396
		2	1219200	276.981		46718.7	38.3191
		5	1106800			46718.7	42.2106
		6	1453300			46718.7	32.1466
	2020-07-10	1	1267300	261.273	272.638	46348.4	36.5725
		2	1726300	284.002		46348.4	26.8484
desD399Y-Cl26 HS 2h	2020-01-31	1	1319800	366.63	366.63	62327.1	47.2246	60.4871	18.5376	10
		6	1349200	404.912	404.912	68835.1	51.0192
		7	1163200	434.324	434.324	73835	63.4758
		8	1381900	382.901	382.901	65093.2	47.1041
	2020-06-19	3	1373700	423.223	423.223	71948	52.3753
	2020-07-03	4	935560	388.76	388.76	66089.2	70.6413
		5	983290	448.681	448.681	76275.8	77.572
		6	1142700	311.143	311.143	52894.3	46.2889
		7	633840		382.861	65086.4	102.686
	2020-07-10	4	1430900	391.26	391.26	66514.2	46.4842
A21V HS 2h	2022-04-29	5	1751800	402.376	402.376	68404	39.0478	14.5696	8.51218	12
		6	2126100	263.185	263.185	44741.4	21.0439
		7	3257700	283.352	283.352	48169.9	14.7865
	2022-05-06	1	3158600	231.523	231.523	39359	12.4609
		2	3721400	223.802	223.802	38046.4	10.2237
		3	4513600	248.932	248.932	42318.5	9.37578
		4	5126400	265.687	265.687	45166.8	8.81062
		5	4565100	186.416	186.416	31690.7	6.94196
	2022-05-13	1	3197700	226.253	226.253	38463	12.0283
		2	2912100	229.642	229.642	39039.2	13.4058
		3	3199200	226.566	226.566	38516.2	12.0393
		4	3064600	264.478	264.478	44961.3	14.6712
					273.996

## Sheet: Young modulus
Condition	Date	Aggregate	2L (pixels)	2 L ( µm)	L ( µm)	R (µm)	fv (N.m^-3)	E (Pa)	E avg (Pa)	E std ( Pa)	N											Sans HS	HS 30 min	HS 2h
desWT-Cl29 no HS	2020-01-24	3	254	478.343	239.171	580.508	26097.9	510.414	488.344	111.563	10									Moyenne	A21V	666.999
		4	242	455.744	227.872	600.753	22667.4	587.93													A29 WT	488.344	247.608	189.84
		6	238	448.211	224.105	583.804	24677.1	600.091													C26 D399Y	641.8	522.158	562.242
		8	277	521.657	260.829	632.768	25769.6	548.57												Ecart-type	A21V	211.529
	2020-06-19	11	226	420.465	210.233	514.884	35213.5	627.562													A29 WT	111.563	117.65	58.7881
	2020-07-03	1	332	672.746	336.373	621.581	34488.1	318.719													C26 D399Y	168.992	169.764	256.572
		2	308	624.113	312.057	592.199	34488.1	328.889
		3	295	597.771	298.886	595.745	34488.1	383.36
		8	274	555.218	277.609	605.37	34488.1	510.11
		9	244	494.428	247.214	543.06	34488.1	467.793
desD399Y-Cl26 no HS	2020-01-24	1	240	451.977	225.989	511.77	38771.8	542.959	641.8	168.992	9
		2	230	433.145	216.573	502.825	39006.8	578.374
		5	239	450.094	225.047	510.358	39051.2	547.678
		7	234	440.678	220.339	475.989	47091	532.429
	2020-06-19	8	254	472.558	236.279	530.233	47206.2	666.5
		9	280	520.93	260.465	512.558	47206.2	434.445
	2020-06-26	6	157	357.224	178.612	431.172	59355.2	848.279
		7	178	405.006	202.503	444.255	59355.2	656.002
		8	147	334.471	167.235	424.346	59355.2	969.537
A21V no HS	2020-07-03	14	210	425.532	212.766	469.605	62819.1	747.355	666.999	211.529	8
		15	143	289.767	144.883	430.598	69087.9	1840.11
	2020-07-10	15	226	424.812	212.406	525.376	49785.4	932.595
		16	221	415.414	207.707	489.662	50399.2	761.847
		17	206	387.218	193.609	482.143	49171.5	862.682
	2020-07-24	1	307	512.093	256.047	562.552	45607.5	641.123
		2	295	492.077	246.038	539.199	48674	650.874
		3	317	528.774	264.387	507.923	52429.7	444.898
	2022-05-13	6	417	437.617	218.808	452.44	31260.5	294.617
desWT-Cl29 HS 30 min	2020-02-21	1	301	655.06	327.53	593.036	51370.4	426.084	247.608	117.65	10
		3	344	748.64	374.32	619.151	51370.4	339.143
		5	368	800.871	400.435	637.65	51370.4	311.642
		7	354	770.403	385.201	589.227	51370.4	255.266
	2020-06-26	1	368	837.315	418.658	555.176	36430.2	111.127
		2	327	744.027	372.014	523.891	36430.2	125.591
		3	305	693.97	346.985	496.018	36430.2	124.374
		4	315	716.724	358.362	501.138	36430.2	117.635
	2020-07-10	12	366	687.97	343.985	599.154	43477.8	324.351
		13	336	631.579	315.789	563.44	45204.6	340.872
desD399Y-Cl26 HS 30 min	2020-02-21	2	292	635.473	317.737	528.292	81561	466.645	522.158	169.764	8
		4	316	687.704	343.852	514.146	81561	330.312
		8	331	720.348	360.174	548.966	81561	373.541
	2020-07-03	10	232	470.111	235.056	468.592	71711.9	627.29
	2020-07-10	7	277	520.677	260.338	480.263	65644.1	466.347
		8	254	477.444	238.722	437.03	68253.9	431.229
	2020-07-24	4	296	493.745	246.872	477.898	77990.9	637.059
		5	259	432.027	216.013	467.89	75410.8	844.846
A21V HS 30 min	2022-04-22	1	498	569.273	284.636	528.978	15741.2	125.929	269.988	156.62	12
		2	393	449.246	224.623	458.676	18982.5	174.674
		3	387	442.387	221.193	449.246	23598.7	209.275
		5	562	642.433	321.216	533.265	9482.06	54.5121
		6	414	473.251	236.626	485.254	16871.7	166.364
	2022-04-29	1	444	484.246	242.123	481.52	40631.4	362.594
		2	500	545.322	272.661	521.873	31697.3	273.29
		3	477	520.238	260.119	510.422	40268.2	365.91
		4	380	414.445	207.222	460.797	41323.8	493.333
	2022-05-06	8	504	528.918	264.459	432.894	45343.3	202.851
		9	426	447.062	223.531	393.54	43125.6	218.218
		10	330	346.315	173.158	399.05	51522.1	592.908
desWT-Cl29 HS 2h	2020-01-31	2	320	633.037	316.518	504.946	26707.6	129.011	189.84	58.7881	9
		3	295	583.581	291.79	490.603	28324.6	155.627
		4	316	625.124	312.562	523.244	29031.2	167.914
	2020-06-19	1	326	606.512	303.256	481.86	46718.7	212.794
		2	291	541.395	270.698	494.884	46718.7	332.859
		5	363	675.349	337.674	512.093	46718.7	196.609
		6	335	623.256	311.628	460	46718.7	162.864
	2020-07-10	1	438	823.308	411.654	585.056	46348.4	183.417
		2	427	802.632	401.316	561.09	46348.4	167.463
desD399Y-Cl26 HS 2h	2020-01-31	1	399	789.318	394.659	578.14	62327.1	266.905	562.242	256.572	10
		6	329	650.841	325.42	517.31	68835.1	337.046
		7	346	684.471	342.235	537.587	73835	362.487
		8	314	621.167	310.584	526.706	65093.2	393.99
	2020-06-19	3	254	472.558	236.279	455.814	71948	554.759
	2020-07-03	4	242	490.375	245.187	525.329	66089.2	804.588
		5	231	468.085	234.043	500	66089.2	759.167
		6	225	455.927	227.964	529.889	66089.2	1036.3
		7	251	508.612	254.306	527.356	66089.2	732.295
	2020-07-10	4	300	563.91	281.955	481.203	66514.2	374.887
A21V HS 2h	2022-04-29	5	404	440.62	220.31	436.258	68404	545.961	248.193	117.679	12
		6	410	447.164	223.582	447.437	44741.4	378.039
		7	456	497.334	248.667	422.079	48169.9	234.266
	2022-05-06	1	861	903.568	451.784	596.607	39359	127.413
		2	669	702.076	351.038	524.195	38046.4	156.472
		3	603	632.812	316.406	510.815	42318.5	214.319
		4	738	774.487	387.243	536.789	45166.8	152.157
		5	618	648.554	324.277	556.728	31690.7	210.362
	2022-05-13	1	495	519.473	259.736	486.447	38463	289.598
		2	567	595.033	297.516	485.707	39039.2	194.392
		3	630	597	298.5	478.314	38516.2	178.598
		4	564	522	261	472.4	44961.3	296.735
