# Supplementary material for: The importance of intermediate filaments in the shape maintenance of myoblast model tissues
Source: eLife. 2022 Dec 1;11:e76409. doi: 10.7554/eLife.76409 (PMC9754632; doi:10.7554/eLife.76409)
Supplement: Figure 5—source data 1. — Roughness of the different multicellular aggregates was reported and compared. Aggregate contours were first extracted, then the roughness of the contour was calculated. Means, medians, and standard deviations are reported for each condition. [file elife-76409-fig5-data1.xlsx]

## Sheet: Feuil1
Condition	Date	Labelling	n°	Date of imaging	Roughness all (µm)	Roughness (per aggregate) (µm)	Average (µm)	Standard deviation (µm)
A21V no HS	2020-07-03	DAPI DESMIN MYC	16	2020-07-31	1.6093		2.09484	0.37808
	2020-07-03	Hoechst p-myosin SPY555ACTIN	16	2022-05-16	1.71047	1.65988
	2020-07-10	DAPI PANCADH SPY555ACTIN MYC	19	2020-07-31	2.2799	2.2799
	2020-07-10	Hoechst p-myosin SPY555ACTIN	18	2022-06-13	2.34475	2.34475
desWT-Cl29 no HS	2020-01-24	DAPI Pancadh Phalloidin Myc	9	2020-07-07	3.1095		2.44235	0.707824
	2020-01-24	DAPI Myosin Desmin Myc	9	2020-07-07	3.4516	3.28055
	2020-01-24	DAPI DESMIN MYC	11	2020-07-31	2.4219
	2020-01-24	Hoechst p-myosin SPY555ACTIN	11	2022-05-16	2.77775
	2020-01-24	Hoechst p-myosin SPY555ACTIN	11	2022-05-20	2.40125	2.53363
	2020-01-24	Hoechst pancadh SPY555ACTIN	10		1.55325	1.55325
	2020-07-03	Hoechst pancadh SPY555ACTIN	19		2.40195	2.40195
desD399Y-Cl26 no HS	2020-06-12	DAPI Myosin desmin	10	2020-06-29	2.2938		2.11463	0.271081
	2020-06-12	DAPI pancadh phalloidin myc	10	2020-06-29	2.0746
	2020-06-12	DAPI Myosin Desmin Myc	10	2020-07-07	2.0061	2.12483
	2020-06-26	DAPI DESMIN MYC	13	2020-07-31	2.5842
	2020-06-26	Hoechst pancadh SPY555ACTIN	13	2022-05-16	2.4322	2.5082
	2020-06-19	Hoechst pancadh SPY555ACTIN	18	2020-05-16	1.8199	1.8199
	2020-01-24	Hoechst p-myosin SPY555ACTIN	13	2022-06-13	2.0056	2.0056
A21V HS 2h	2022-05-13	Hoechst SPY555ACTIN	2	2022-07-11	2.9411	2.9411	2.8375	0.35354
	2022-05-06	Hoechst SPY555ACTIN	7	2022-07-11	2.29228	2.29228
	2022-04-29	Hoechst SPY555ACTIN	7	2022-07-11	2.75253	2.75253
	2022-05-04	Hoechst phosphomyosin desmin Myc	6	2022-07-13	3.2526	3.2526
	2022-05-06	Hoechst phosphomyosin desmin Myc	15	2022-07-13	2.949	2.949
desWT-Cl29 HS 2h	2020-06-12	DAPI Pancadherin Phalloidin Myc	11	2020-06-29	3.979		2.54944	0.507064
	2020-06-12	DAPI Myosin Desmin Myc	11	2020-06-29	2.7526	3.3658
	2020-07-10	DAPI PANCADH SPY555ACTIN MYC	25	2020-07-31	2.4369
	2020-07-10	DAPI DESMIN MYC	25	2020-07-31	2.5425	2.4897
	2020-06-12	DAPI DESMIN MYC	6	2020-11-09	2.9183	2.9183
	2020-06-19	DAPI DESMIN MYC	15	2020-11-09	2.0034	2.0034
	2020-07-10	DAPI DESMIN MYC	26	2020-11-09	2.1051
	2020-07-10	Hoechst pand-cadh SPYACT555	26	2022-05-16	3.3745	2.7398
	2020-01-31	Hoechst phosphomyosin desmin Myc	3	2022-07-13	1.9344	1.9344
	2020-07-10	Hoechst phosphomyosin desmin Myc	27	2022-07-13	2.3947	2.3947
desD399Y-Cl26 HS 2h	2020-01-31	DAPI Pancadherin Phalloidin Myc	9	2020-06-29	2.4735	2.4735	2.42705	0.320776
	2020-06-12	DAPI Pancadh Phalloidin Myc	12	2020-06-29	1.6365
	2020-06-12	DAPI Myosin Desmin Myc	12	2020-07-07	3.1247	2.3806
	2020-07-10	DAPI DESMIN MYC	28	2020-07-31	1.6871
	2020-07-10	DAPI PANCADH SPY555ACTIN MYC	28	2020-07-31	1.8068
	2020-07-10	Hoechst p-myosin SPY555ACTIN	28	2022-05-16	2.0647	1.85287
	2020-01-31	Hoechst phosphomyosin desmin Myc	10	2022-07-13	2.38575	2.38575
	2020-07-10	Hoechst phosphomyosin desmin Myc	29	2022-07-13	2.73495	2.73495
